# Supplementary material
Source: PubMed Central journal article supplement (PMC6882450)
Supplement: Supp_Table1.pdf [file Supp_Table1.pdf]

SUPPLEMENTARY TABLE S1. BASELINE DEMOGRAPHICS BY TRINARY SURPRISE QUESTION RESPONSE

|                                   | <i>SQ</i>            |                               |                          |                                    |
|-----------------------------------|----------------------|-------------------------------|--------------------------|------------------------------------|
|                                   | <i>Total (n=271)</i> | <i>Very surprised (n=171)</i> | <i>Ambivalent (n=50)</i> | <i>Not at all surprised (n=50)</i> |
| Age                               | 71.0 [66.0, 77.0]    | 68.0 [65.0, 74.0]             | 75.5 [70.0, 79.0]        | 77.0 [70.0, 83.0]                  |
| Female                            | 126 (46%)            | 80 (47%)                      | 26 (52%)                 | 20 (40%)                           |
| Race                              |                      |                               |                          |                                    |
| White/other                       | 223 (82%)            | 139 (81%)                     | 44 (88%)                 | 40 (80%)                           |
| Black                             | 48 (18%)             | 32 (19%)                      | 6 (12%)                  | 10 (20%)                           |
| Marital status                    |                      |                               |                          |                                    |
| Divorced                          | 33 (12%)             | 24 (14%)                      | 4 (8%)                   | 5 (10%)                            |
| Married                           | 173 (64%)            | 111 (65%)                     | 32 (64%)                 | 30 (60%)                           |
| Single/other                      | 18 (7%)              | 10 (6%)                       | 3 (6%)                   | 5 (10%)                            |
| Widow/widower                     | 47 (17%)             | 26 (15%)                      | 11 (22%)                 | 10 (20%)                           |
| Education                         |                      |                               |                          |                                    |
| Less than high school diploma     | 29 (11%)             | 15 (9%)                       | 6 (12%)                  | 8 (16%)                            |
| High school diploma or equivalent | 68 (25%)             | 41 (24%)                      | 9 (18%)                  | 18 (36%)                           |
| Some college                      | 60 (22%)             | 36 (21%)                      | 17 (34%)                 | 7 (14%)                            |
| College degree or higher          | 114 (42%)            | 79 (46%)                      | 18 (36%)                 | 17 (34%)                           |
| Income <sup>a</sup>               |                      |                               |                          |                                    |
| Less than \$20,000                | 42 (15%)             | 21 (12%)                      | 10 (20%)                 | 11 (22%)                           |
| \$20,000 to \$39,999              | 69 (25%)             | 45 (26%)                      | 9 (18%)                  | 15 (30%)                           |
| \$40,000 to \$59,999              | 51 (19%)             | 34 (20%)                      | 9 (18%)                  | 8 (16%)                            |
| \$60,000 to \$79,999              | 43 (16%)             | 29 (17%)                      | 10 (20%)                 | 4 (8%)                             |
| \$80,000 to \$99,999              | 16 (6%)              | 10 (6%)                       | 3 (6%)                   | 3 (6%)                             |
| \$100,000 or above                | 46 (17%)             | 31 (18%)                      | 8 (16%)                  | 7 (14%)                            |
| Insurance                         |                      |                               |                          |                                    |
| Private                           | 77 (28%)             | 58 (34%)                      | 11 (22%)                 | 8 (16%)                            |
| Medicaid/Medical Assistance       | 12 (4%)              | 5 (3%)                        | 3 (6%)                   | 4 (8%)                             |
| Medicare/Medicare Advantage       | 182 (67%)            | 108 (63%)                     | 36 (72%)                 | 38 (76%)                           |
| Hypertension                      | 265 (98%)            | 165 (96%)                     | 50 (100%)                | 50 (100%)                          |
| Diabetes                          | 32 (12%)             | 16 (9%)                       | 8 (16%)                  | 8 (16%)                            |
| Cardiovascular disease            | 117 (43%)            | 61 (36%)                      | 26 (52%)                 | 30 (60%)                           |
| Heart failure                     | 65 (24%)             | 27 (16%)                      | 12 (24%)                 | 26 (52%)                           |
| Chronic lung disease              | 36 (13%)             | 20 (12%)                      | 7 (14%)                  | 9 (18%)                            |
| Malignancy                        | 68 (25%)             | 43 (25%)                      | 15 (30%)                 | 10 (20%)                           |
| CCI                               | 5 [3, 6]             | 4 [3, 6]                      | 5 [4, 6]                 | 5 [5, 7]                           |
| CCI                               |                      |                               |                          |                                    |
| [2, 4]                            | 126 (46%)            | 92 (54%)                      | 22 (44%)                 | 12 (24%)                           |
| [4, 12]                           | 145 (54%)            | 79 (46%)                      | 28 (56%)                 | 38 (76%)                           |
| BMI <sup>b</sup>                  | 30 [26, 35]          | 31 [27, 35]                   | 30 [26, 34]              | 28 [24, 34]                        |
| eGFR <sup>c</sup>                 | 22.8 [16.9, 28.3]    | 23.7 [17.3, 28.4]             | 24.6 [17.4, 28.6]        | 19.1 [15.7, 23.9]                  |

Continuous variables expressed as median (25%, 75%); categorical variables expressed as *n* (%). Patient characteristics grouped by trinary response for parsimony.

<sup>a</sup>Four patients declined to answer.

<sup>b</sup>One patient with no BMI measurement.

<sup>c</sup>Calculated using the Modification of Diet in Renal Disease equation.

ADL, activity of daily living; BMI, body mass index; CCI, Charlson comorbidity index; eGFR, estimated glomerular filtration rate; iADL, instrumental activity of daily living; SQ, surprise question.
