# Supplementary material
Source: PubMed Central journal article supplement (PMC6882450)
Supplement: Supp_Table2.pdf [file Supp_Table2.pdf]

SUPPLEMENTARY TABLE S2. RESPONSES TO SURPRISE QUESTION AND SELF-RATED HEALTH

| <i>SRH</i> | <i>SQ</i>                   |                      |                   |                  |                       | <i>Combined</i> |
|------------|-----------------------------|----------------------|-------------------|------------------|-----------------------|-----------------|
|            | <i>Not at all surprised</i> | <i>Not surprised</i> | <i>Ambivalent</i> | <i>Surprised</i> | <i>Very surprised</i> |                 |
| Poor       | 20% (2)                     | 18% (7)              | 12% (6)           | 5% (4)           | 5% (4)                | 8% (23)         |
| Fair       | 60% (6)                     | 45% (18)             | 46% (23)          | 44% (37)         | 24% (21)              | 39% (105)       |
| Good       | 10% (1)                     | 32% (13)             | 30% (15)          | 35% (30)         | 48% (41)              | 37% (100)       |
| Very good  | 10% (1)                     | 5% (2)               | 12% (6)           | 15% (13)         | 21% (18)              | 15% (40)        |
| Excellent  | 0% (0)                      | 0% (0)               | 0% (0)            | 1% (1)           | 2% (2)                | 1% (3)          |
| Combined   | 4% (10)                     | 15% (40)             | 18% (50)          | 31% (85)         | 32% (86)              | 100% (271)      |

SRH, self-rated health.
