# Supplementary material
Source: PubMed Central journal article supplement (PMC6882450)
Supplement: Supp_Table3.pdf [file Supp_Table3.pdf]

SUPPLEMENTARY TABLE S3. CORRELATIONS BETWEEN SUBJECTIVE HEALTH MEASURES, FRAILTY, AND FUNCTIONAL STATUS WHILE ACCOUNTING FOR TIES

|     | <i>Fried frailty</i> | <i>CFS</i>       | <i>ADL</i>       | <i>iADL</i>      | <i>SRH</i>       |
|-----|----------------------|------------------|------------------|------------------|------------------|
| SQ  | 0.35 (0.23–0.46)     | 0.56 (0.45–0.66) | 0.57 (0.32–0.82) | 0.54 (0.41–0.67) | —                |
| SRH | 0.50 (0.40–0.61)     | 0.52 (0.41–0.63) | 0.45 (0.16–0.75) | 0.48 (0.33–0.63) | 0.35 (0.22–0.48) |

Correlations are presented as Goodman–Kruskal’s Gamma with 95% confidence intervals.  
CFS, Clinical Frailty Scale.
